# Supplementary material for: KIBRA is associated with accelerated cognitive decline and hippocampal atrophy in APOE ε4-positive cognitively normal adults with high Aβ-amyloid burden
Source: PubMed Central journal article supplement (PMC5794989; doi:10.1038/s41598-018-20513-y), 2018-02-01
Supplement: 41598_2018_20513_MOESM1_ESM.pdf [file 41598_2018_20513_MOESM1_ESM.pdf]

## Supplementary Material

### ***KIBRA is associated with accelerated cognitive decline and hippocampal atrophy in APOE $\epsilon$ 4-positive cognitively normal adults with high A $\beta$ -amyloid burden***

Tenielle Porter<sup>1,2</sup>, Samantha C. Burnham<sup>3</sup>, Vincent Doré<sup>4,5</sup>, Greg Savage<sup>6</sup>, Pierrick Bourgeat<sup>4</sup>, Kimberly Begemann<sup>1</sup>, Lidija Milicic<sup>1</sup>, David Ames<sup>7,8</sup>, Ashley I. Bush<sup>9</sup>, Paul Maruff<sup>9,10</sup>, Colin L. Masters<sup>9</sup>, Christopher C. Rowe<sup>5,11</sup>, Stephanie Rainey-Smith<sup>12</sup>, Ralph N. Martins<sup>12,13</sup>, David Groth<sup>14</sup>, Giuseppe Verdile<sup>12,14</sup>, Victor L. Villemagne<sup>5,9,11</sup>, and Simon M. Laws<sup>1,2,14\*</sup>,

**Supplementary Table 1. Mean slopes for cognitive composites and hippocampal atrophy in all imaged cognitively normal participants by *KIBRA* carrier status**

|                               | <i>KIBRA</i> T carrier | <i>KIBRA</i> non-T carrier |       |
|-------------------------------|------------------------|----------------------------|-------|
|                               | $\beta$                | $\beta$                    | p     |
| <b>Global</b>                 | 0.028                  | -0.025                     | 0.051 |
| <b>Verbal Episodic Memory</b> | 0.028                  | -0.019                     | 0.085 |
| <b>Hippocampal Atrophy</b>    | -0.017                 | -0.026                     | 0.242 |

Mean slopes for cognitive composites (presented in SD/year; n=602) and hippocampal atrophy (presented in cm<sup>3</sup>/year; n=548) in all imaged cognitively normal participants, controlling for *APOE*  $\epsilon$ 4 carrier and A $\beta$ -amyloid status. \*Represents a nominally statistically significant difference in slope of the *KIBRA* non-T carrier (C\_C) group when compared to the *KIBRA* T carrier (T\_T and C\_T) group.

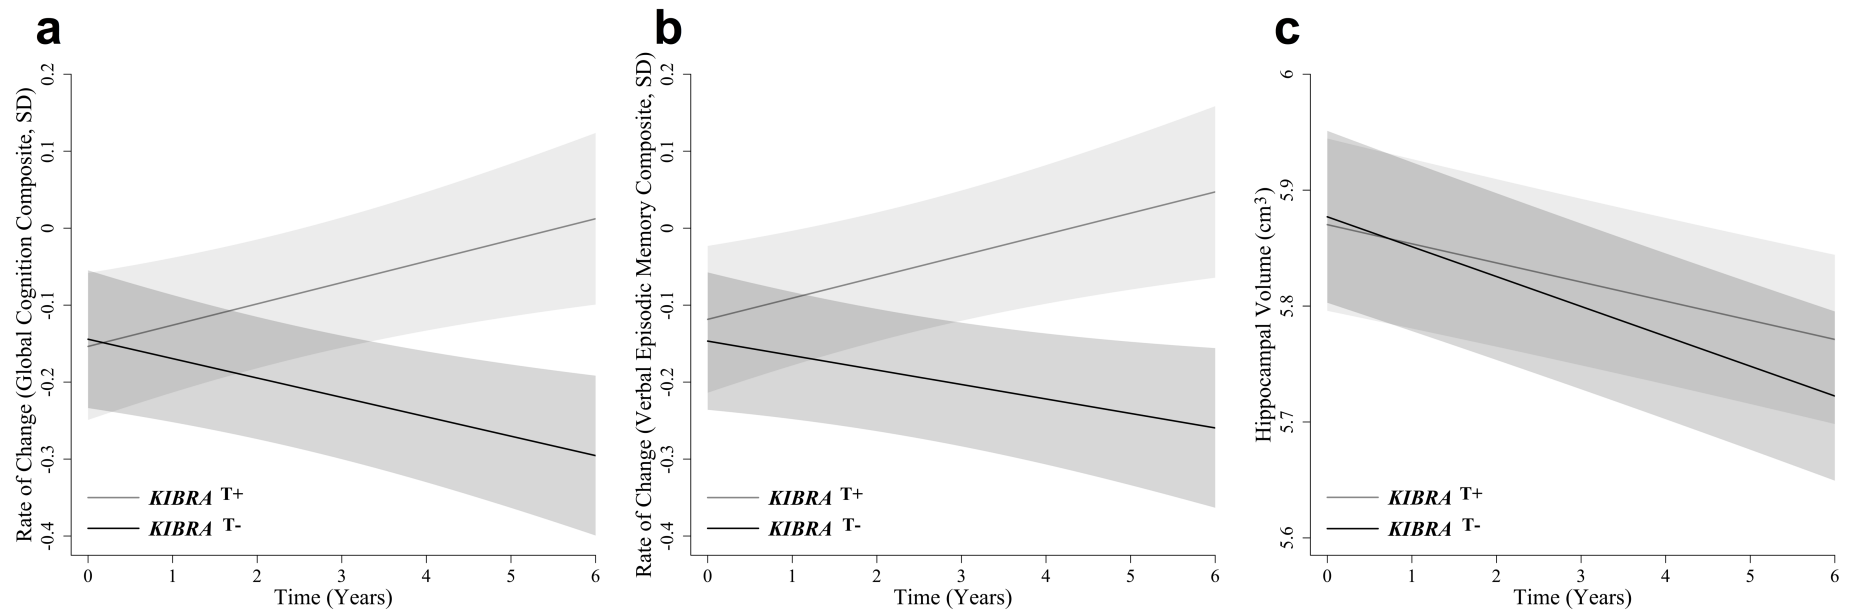

**Supplementary Figure 1. Rates of change in cognitively normal adults based on *KIBRA* T carriage.**

Rates of change are presented for (a) a statistically driven global composite, (b) a verbal episodic memory composite, (c) hippocampal atrophy (n=548) in cognitively normal adults (n=602 unless otherwise stated). *KIBRA* T carriers (grey) and non-T carriers (black), controlling for *APOE*  $\epsilon$ 4 carrier and A $\beta$ -amyloid status. Hippocampal atrophy analysis also controlled for gender (shading represents time dependent standard error, \* p<0.05).
